# Supplementary material for: An amphiphilic polyoxometalate–CNT nanohybrid as a highly efficient enzyme-free electrocatalyst for H2O2 sensing
Source: Royal Society of Chemistry journal article supplement (doi:10.1039/d2nj03112d), 2022-01-01
Supplement: d2nj03112d1.pdf [file d2nj03112d1.pdf]

## Supplementary Information

### **Amphiphilic Polyoxometalate-CNTs Nanohybrid as Highly Efficient Enzyme-free Electrocatalyst for H<sub>2</sub>O<sub>2</sub> Sensing**

Eman Gul<sup>a</sup>, Gul Rahman<sup>b</sup>, Yuefeng Wu<sup>c</sup>, Tanveer Hussain Bokhari<sup>d</sup>, Ata ur Rahman<sup>b</sup>, Amina Zafar<sup>e</sup>, Zohaib Rana<sup>c</sup>, Attaullah Shah<sup>f</sup>, Shafqat Hussain<sup>a</sup>, Khan Maaz<sup>a</sup>, Shafqat Karim<sup>a</sup>, Saqib Javaid<sup>g</sup>, Hongyu Sun<sup>h</sup>, Mashkooor Ahmad<sup>a,\*</sup>, Guolei Xiang<sup>c,\*</sup>, Amjad Nisar<sup>a\*</sup>

<sup>a</sup> Nanomaterials Research Group, PD, PINSTECH, Islamabad 44000, Pakistan

<sup>b</sup> Institute of Chemical Sciences, University of Peshawar, Peshawar 25000, Pakistan

<sup>c</sup> State Key Laboratory of Chemical Resource Engineering, Beijing University of Chemical Technology, Beijing 100029, PR China

<sup>d</sup> Department of Chemistry, GC University, Faisalabad 38000, Pakistan

<sup>e</sup> CAFD, PINSTECH, Islamabad 44000, Pakistan

<sup>f</sup> National Institute of Lasers and Optronics College, PIEAS, Islamabad 44000, Pakistan

<sup>g</sup>Theoretical Physics Division, PINSTECH, Islamabad 44000, Pakistan

<sup>h</sup> School of Resources and Materials, Northeastern University at Qinhuangdao, Qinhuangdao, 066004 PR China

**Table S1.** The assignment of FTIR spectra

| H <sub>3</sub> PW <sub>12</sub> O <sub>40</sub><br>(cm <sup>-1</sup> ) | HPW<br>(cm <sup>-1</sup> ) | CHPW<br>(cm <sup>-1</sup> ) | Assignment*                                    |
|------------------------------------------------------------------------|----------------------------|-----------------------------|------------------------------------------------|
| 3503                                                                   |                            | 3328                        | OH str.                                        |
|                                                                        | 2923-2850                  | 2926-2851                   | CH <sub>2</sub> asym. Str.                     |
| 1630                                                                   |                            | 1640                        | C=C str.                                       |
|                                                                        | 1469                       | 1468                        | C-H str.                                       |
| 1084                                                                   | 1084                       | 1083                        | P-O asym. str.                                 |
| 987                                                                    | 987                        | 976                         | W=O <sub>t</sub> . Str                         |
| 891                                                                    | 891                        | 890                         | W-O <sub>b</sub> -W (corner sharing oxygen)    |
| 761                                                                    | 861                        | 870                         | W-O <sub>c</sub> -W str. (edge sharing oxygen) |

\* asym. str., asymmetric stretching; sym. str., symmetric stretching

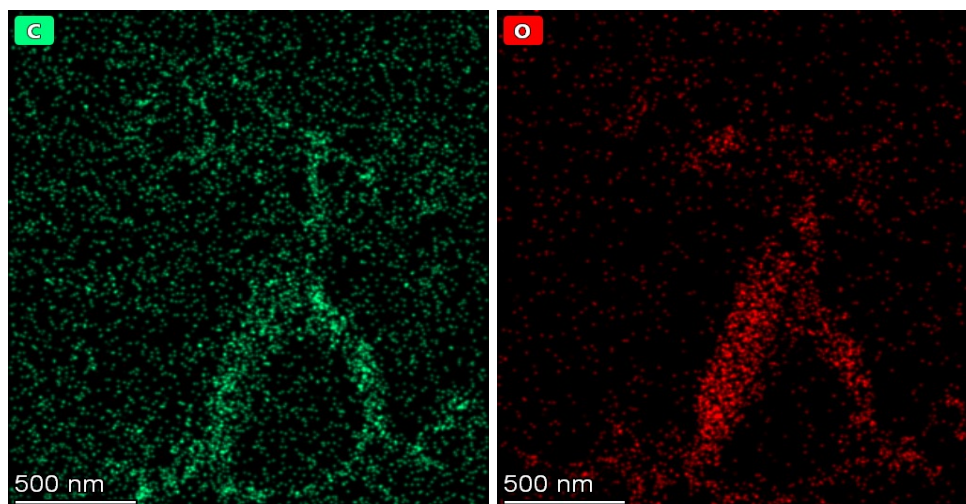**Fig. S1.** C and O elements mapping in POM-CNTs amphiphilic nanostructures.

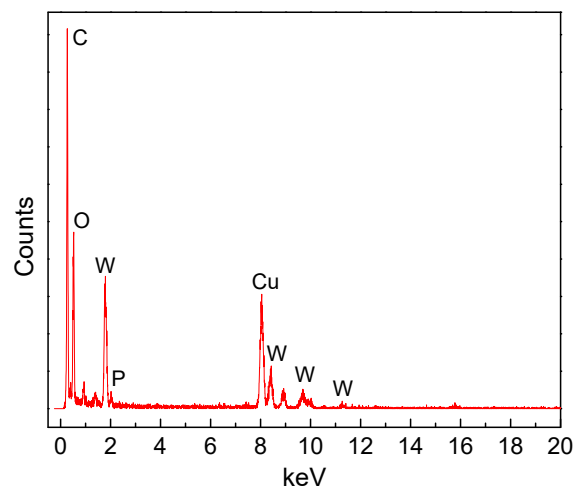

**Figure S2.** EDX spectra of POM-CNTs amphiphilic nanostructures.

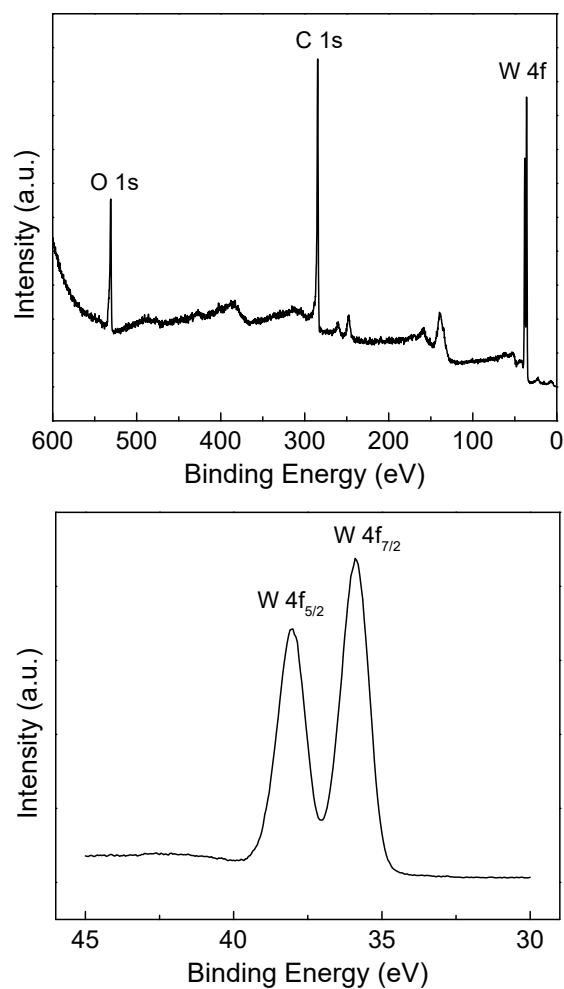

**Figure S3.** XPS analysis of representative POM-CNTs composite (CHPW): survey spectrum (upper) and narrow scan of W4f (lower).

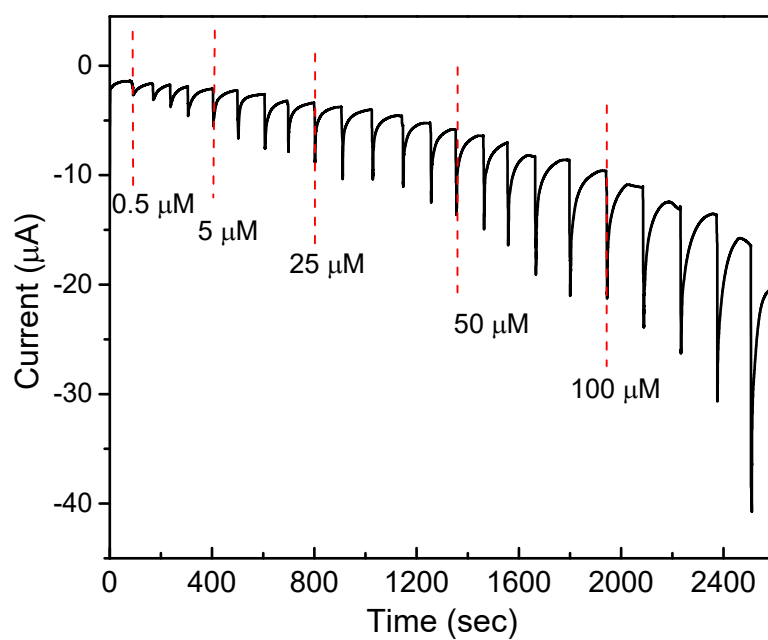

**Fig. S4.** Amperometry response of CHPW electrode at low concentrations of H<sub>2</sub>O<sub>2</sub> at pH-5.

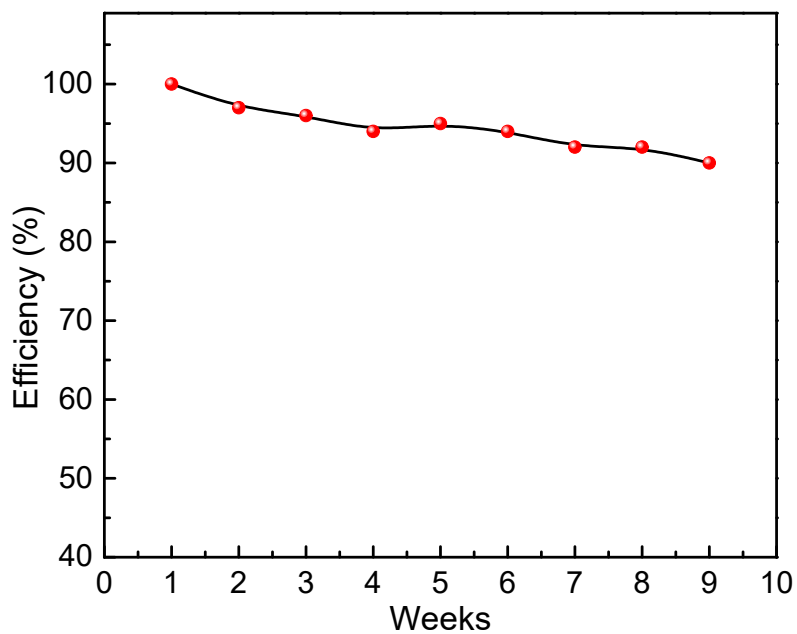

**Fig. S5.** The long-term stability of the CHPW modified electrode at pH-5.

**Table S2.** Comparison of various POMs-modified electrodes for H<sub>2</sub>O<sub>2</sub> measurements.

| Electrode                                                         | Electrolyte                                                         | Linear range (M)                              | Sensitivity<br>( $\mu\text{AmM}^{-1}\text{cm}^{-2}$ ) | LOD (M)*             | Reference |
|-------------------------------------------------------------------|---------------------------------------------------------------------|-----------------------------------------------|-------------------------------------------------------|----------------------|-----------|
| P2W18/CNTs/AuNPs                                                  | Na <sub>2</sub> SO <sub>4</sub> -<br>H <sub>2</sub> SO <sub>4</sub> | $1 \times 10^{-6}$ to $98 \times 10^{-6}$     | 596.1                                                 | $9 \times 10^{-9}$   | 36        |
| PPy/PMo <sub>12</sub> /Au                                         | H <sub>2</sub> SO <sub>4</sub>                                      | $1 \times 10^{-2}$ to $1 \times 10^{-5}$      | -                                                     | -                    | 65        |
| Zr/POM                                                            | HClO <sub>4</sub>                                                   | -                                             | 732                                                   | $9 \times 10^{-5}$   | 66        |
| PMo <sub>12</sub> /PPy-bulk-modified CPE                          | Na <sub>2</sub> SO <sub>4</sub> +<br>H <sub>2</sub> SO <sub>4</sub> | $2 \times 10^{-4}$ to $3 \times 10^{-2}$      | 1.1                                                   | $5 \times 10^{-5}$   | 67        |
| PLL-GA-PW-modified GCE                                            | H <sub>2</sub> SO <sub>4</sub>                                      | $2.5 \times 10^{-6}$ to $6.85 \times 10^{-3}$ | 1.69                                                  | -                    | 61        |
| PEI/rGO)-Au@P <sub>8</sub> W <sub>48</sub>                        | PBS                                                                 |                                               | 74.56                                                 | $3.1 \times 10^{-7}$ | 68        |
| Fe <sup>3+</sup> and Cu <sup>2+</sup> POM doped polypyrrole films |                                                                     | $3 \times 10^{-4}$                            | 0.56                                                  | $5.6 \times 10^{-7}$ | 69        |
| ERGO/Au NPs/POM                                                   | -                                                                   | -                                             | 740.8                                                 | $5.6 \times 10^{-7}$ | 70        |
| PEI/BSA-G/(BSA-G <sup>+</sup> /AuNPs) <sub>5</sub> /FTO           | -                                                                   | -                                             | 72.9                                                  | $1 \times 10^{-6}$   | 71        |
| CHPW                                                              | PBS                                                                 | $3 \times 10^{-4}$ to $1.35 \times 10^{-3}$   | 11450                                                 | $5 \times 10^{-7}$   | This work |

\* LOD (M), Limit of Detection (Molar)

**Table S3.** Real samples analysis for the measurement of H<sub>2</sub>O<sub>2</sub> using CHPW.

| Sample                | Initially measured ( $\mu\text{M}$ ) | Added ( $\mu\text{M}$ ) | Expected ( $\mu\text{M}$ ) | Finally measured ( $\mu\text{M}$ ) | Recovery (%) | RSD (%)    |
|-----------------------|--------------------------------------|-------------------------|----------------------------|------------------------------------|--------------|------------|
| Hand Sanitizer        | 324                                  | 350                     | 674                        | 638                                | 94.6         | $\pm 2.97$ |
| Surface cleaner       | 568                                  | 600                     | 1168                       | 1068                               | 91.4         | $\pm 2.05$ |
| Contact lens solution | 480                                  | 500                     | 980                        | 965                                | 98.4         | $\pm 1.96$ |
| Processed Milk        | 254                                  | 300                     | 554                        | 536                                | 96.7         | $\pm 3.35$ |
